# Supplementary material
Source: PubMed Central journal article supplement (PMC6246818)
Supplement: NIHMS1508278-supplement-1.pdf [file NIHMS1508278-supplement-1.pdf]

Supporting data 1. LXB<sub>4</sub> does not enhance antibody production in B cells stimulated with CpG ODN alone.

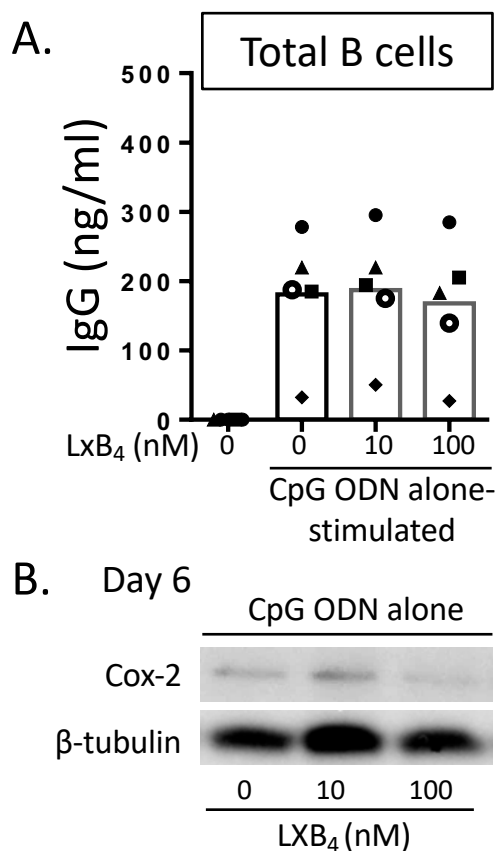

**Supporting data 1. LXB<sub>4</sub> does not enhance antibody production in B cells stimulated with CpG ODN alone.** CD19<sup>+</sup> B cells from healthy individuals were isolated and treated with LXB<sub>4</sub> in nanomolar concentrations, followed by stimulation with CpG ODN for certain amount of time. (A) Cells were cultured for 7-8 days and the amount of IgG in culture supernatants was measured using an ELISA. Experiments were done using 5 different donors. (B) Cells were cultured for 6 days and cell lysates were collected to measure Cox-2 protein expression levels using western blot. Experiments were done in 2 different donors and the image from a representative donor is shown.

Supporting data 2. LXB<sub>4</sub> added starting at Day 0 but not only at day 5 and 6 enhances IgG production from human B cells in culture stimulated with MBCC.

A. Purified human B Cells  
LXB<sub>4</sub> added at Day 0

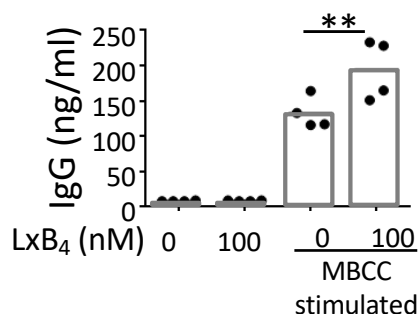

B.

Purified human B Cells  
LXB<sub>4</sub> added at Day 5

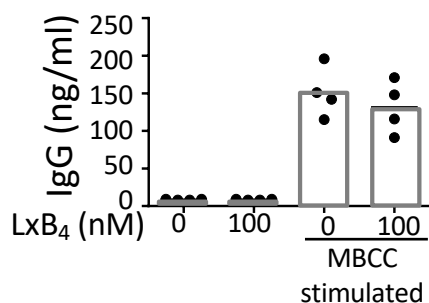

**Supporting data 2. LXB<sub>4</sub> added starting at Day 0 but not only at day 5 and 6 enhances IgG production from human B cells in culture stimulated with MBCC.**

CD19<sup>+</sup> B cells from healthy individuals were isolated and treated with 100 nM LXB<sub>4</sub> or not in the presence of a memory B cell cocktail (MBCC) or not as indicated. (A) Cells were cultured for 6-7 days and LXB<sub>4</sub> was added starting at Day 0 and the amount of IgG in culture supernatants was measured using an ELISA. (B) Cells were cultured for 6-7 days and LXB<sub>4</sub> was added starting at Day 5 and the amount of IgG in culture supernatants was measured using an ELISA. Results are from 1 donor run in quadruplicate. \*\* p < 0.001.
